# Supplementary material
Source: MDPI journal article supplement (https://www.mdpi.com/2073-4441/14/19/3015)
Supplement: s1 [file s1 › water-1905082-supplementary.pdf]

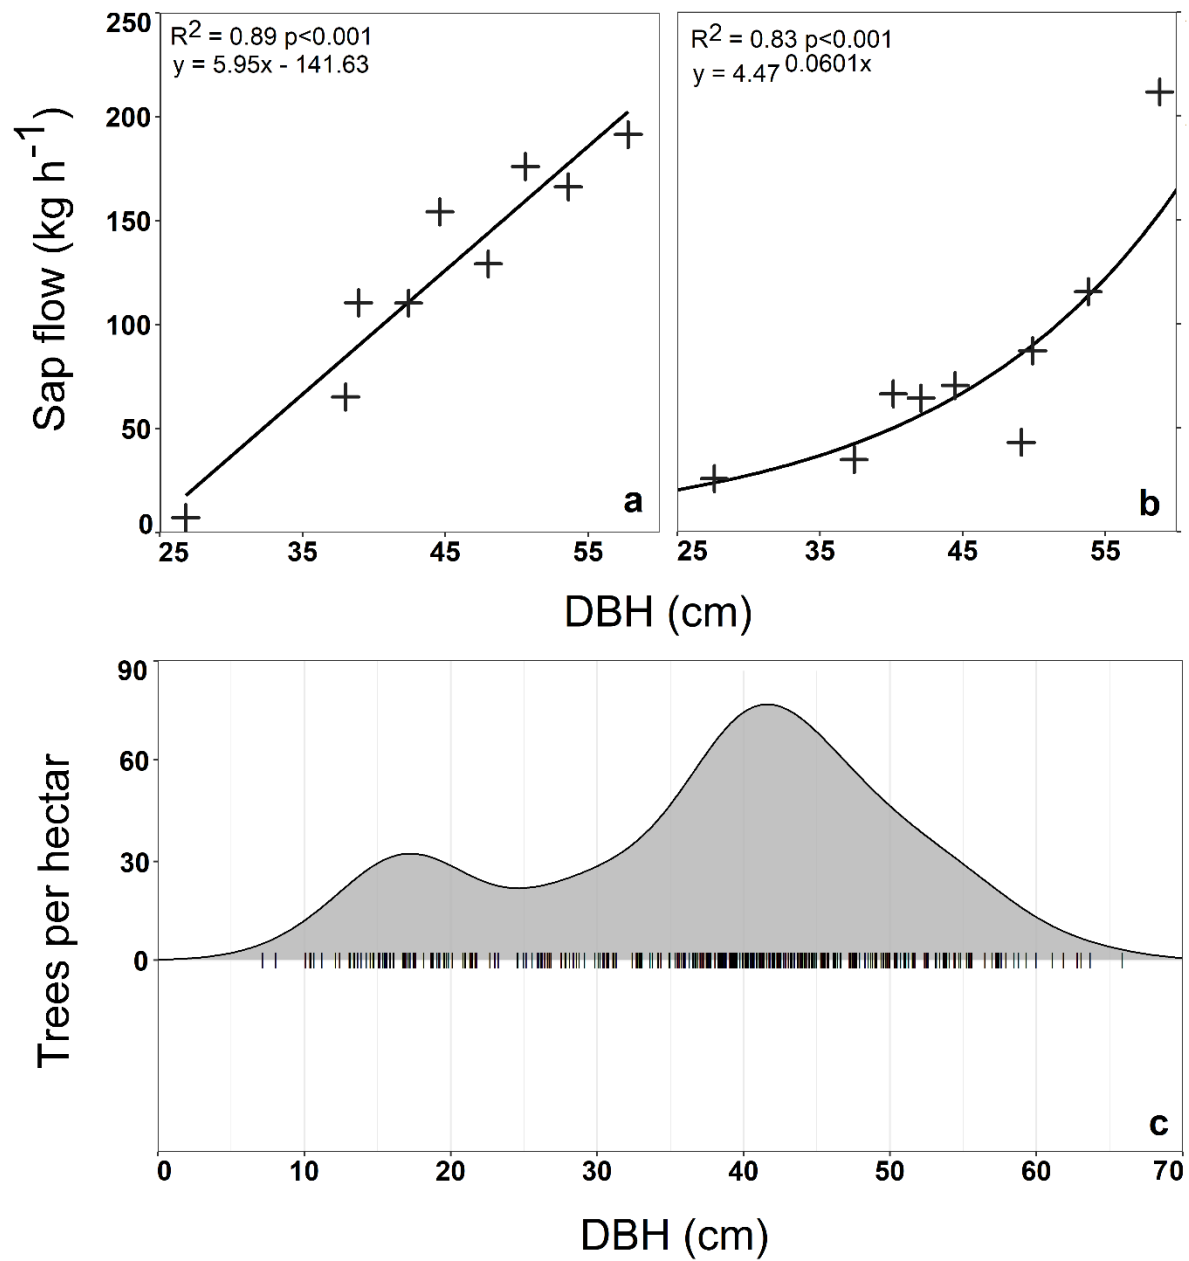

Figure S1: The scaling curves for transpiration upscaling based on diameter at breast height (DBH) for years 2019 (a) and 2020 (b). The DBH distribution of the trees within the area of interest used for the upscaling (c).

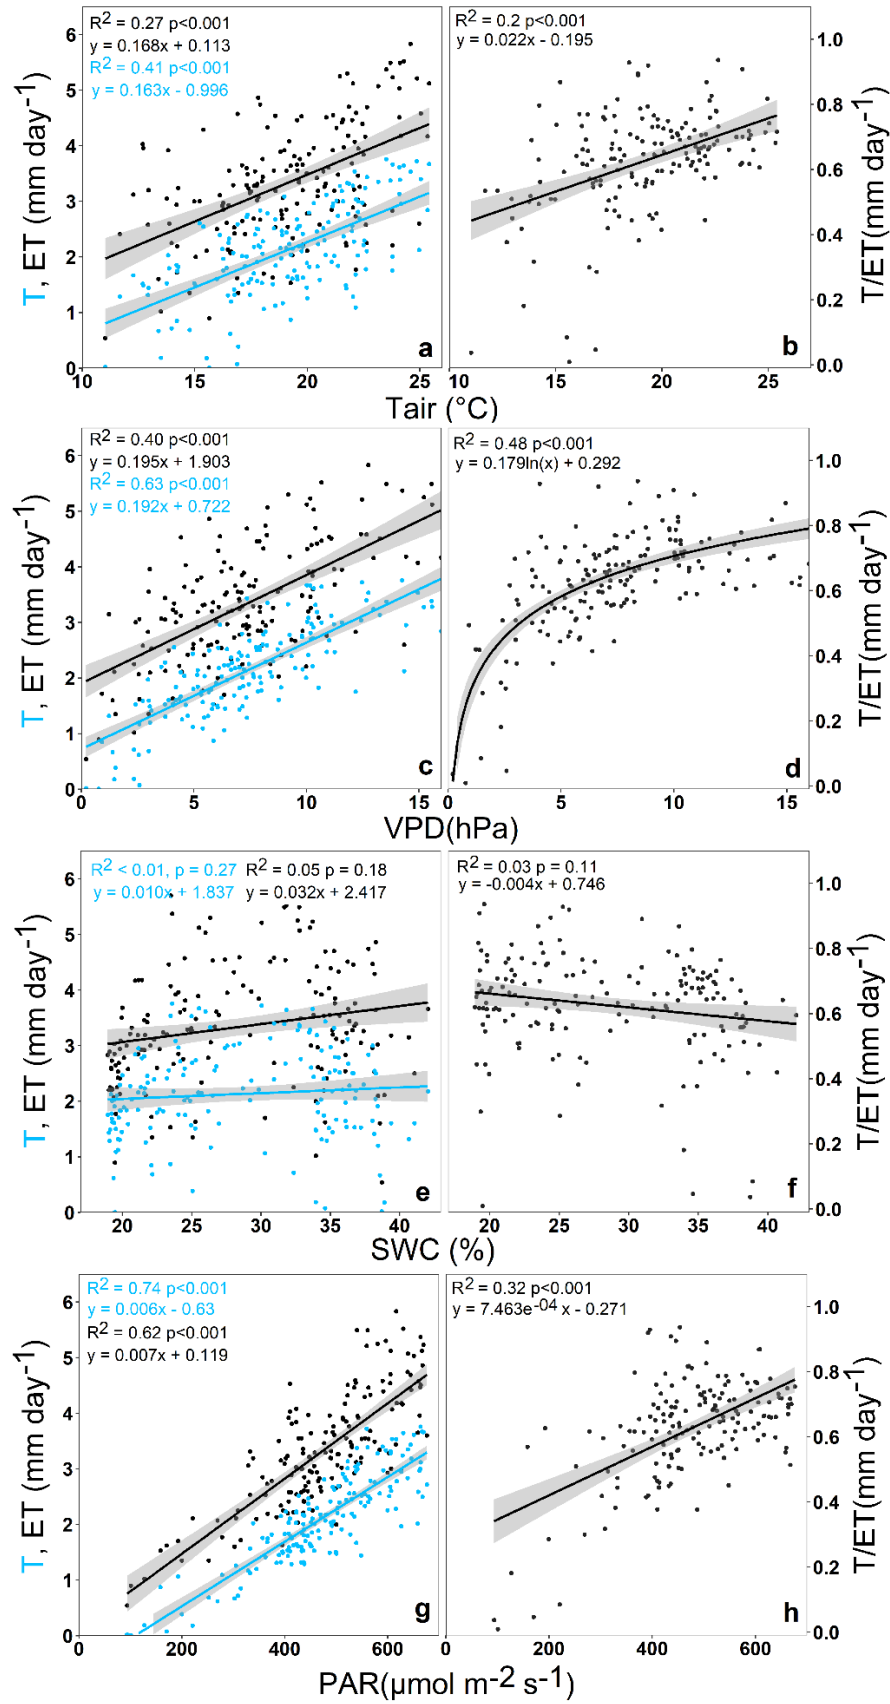

Figure S2: Impact of daily mean air temperature (a, b), vapour pressure deficit (c, d), soil water content (e, f) and photosynthetic active radiation (g, h) on daily sums of ecosystem transpiration, evapotranspiration and transpiration/evapotranspiration ratio during the 2019-2020 (June-August) period.
